# Supplementary material for: microRNA-149 targets caspase-2 in glioma progression
Source: PubMed Central journal article supplement (PMC5041987; doi:10.18632/oncotarget.8506), 2016-03-30
Supplement: oncotarget-07-26388-s001.pdf [file oncotarget-07-26388-s001.pdf]

## microRNA-149 targets caspase-2 in glioma progression

### Supplementary Materials

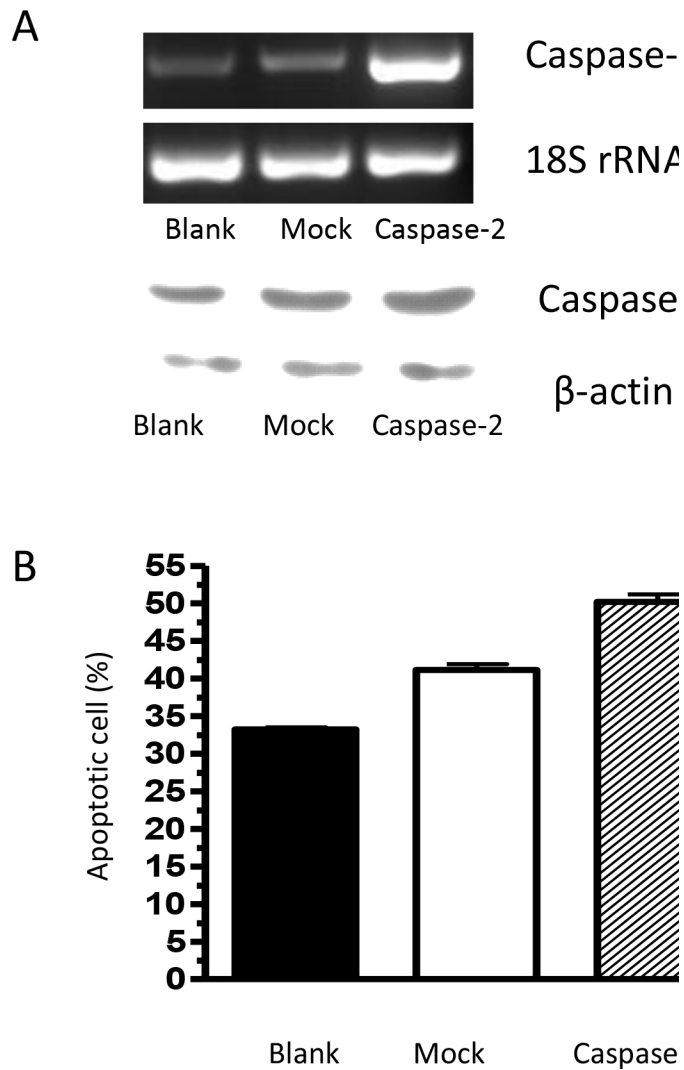

**Supplementary Figure S1: Caspase-2 expression resists to cisplatin induced apoptosis.** (A) RT-PCR and Western blot showing relative caspase-2 expression in U87-MG cells. (B) Apoptosis induced by cisplatin was augmented by caspase-2 expression.
